1 **Temperature shapes movement and habitat selection by a heat-**  
2 **sensitive ungulate**

3  
4  
5  
6 Jesse M. Alston<sup>a,b\*</sup>, Michael J. Joyce<sup>c</sup>, Jerod A. Merkle<sup>a</sup>, and Ron A. Moen<sup>c,d</sup>

7  
8 <sup>a</sup>Department of Zoology and Physiology, University of Wyoming, Laramie, WY, USA

9 <sup>b</sup>Program in Ecology, University of Wyoming, Laramie, WY, USA

10 <sup>c</sup>Natural Resources Research Institute, University of Minnesota – Duluth, Duluth, MN, USA

11 <sup>d</sup>Department of Biology, University of Minnesota – Duluth, Duluth, MN, USA

12 \*Corresponding author: [jalston@uwyo.edu](mailto:jalston@uwyo.edu)

13  
14  
15  
16

## 17 **Abstract**

- 18     **1.** Warmer weather caused by climate change poses increasingly grave threats to the  
19         persistence of many species, but animals can modify behavior to mitigate at least some of  
20         the threats posed by warmer temperatures. Identifying and characterizing how animals  
21         behaviorally thermoregulate to avoid the negative consequences of acute heat will be  
22         crucial for predicting animal responses to a warmer future.
- 23     **2.** We used a step-selection function to reveal whether moose (*Alces alces*), a species known  
24         to be sensitive to heat, mitigate heat via reduced movement, increased visitation to shade,  
25         or increased visitation to water on hot summer days in northeastern Minnesota, USA.
- 26     **3.** Moose reduced movement, sought shade, and traveled nearer to mixed forests and bogs  
27         during periods of heat. Moose used shade far more than water to ameliorate heat, and the  
28         most pronounced changes in behavior occurred between 15°C and 20°C.
- 29     **4.** When temperatures are high, moose face tradeoffs between foraging and keeping cool.  
30         Forgoing foraging to avoid overheating may have contributed to recent population  
31         declines in our study area and other areas across the southern edge of moose distribution.
- 32     **5.** Research characterizing the behaviors animals use to facilitate thermoregulation and the  
33         consequences of those behaviors for fitness will aid conservation of heat-sensitive species  
34         in a warming world. Step-selection functions are a promising tool for such analyses.

35

36     **Key-words** climate change, habitat selection, habitat use, lidar, moose (*Alces alces*), resource  
37     selection, step-selection function, thermal refugia

38

39

## 40 **1. Introduction**

41 Animal performance peaks within a limited range of body temperatures in which  
42 molecular, cellular, and systemic processes operate optimally. Body temperatures outside this  
43 range impose functional constraints on these processes, including reductions in growth,  
44 reproduction, activity, and immune function (Pörtner & Farrell, 2008). Nevertheless, animals  
45 routinely operate in environmental conditions that trigger suboptimal body temperatures (Boyles,  
46 Seebacher, Smit, & McKechnie, 2011; Sunday et al., 2014). This conundrum underlies two long-  
47 standing questions in biological research: (1) How can animals mitigate suboptimal thermal  
48 conditions, and (2) how effective are those efforts at mitigation? Rapid and ongoing responses to  
49 global climate change by a multitude of animal species (Hoegh-Guldberg & Bruno, 2010;  
50 Parmesan, 2006; Walther et al., 2002) increase the urgency of answering those questions.

51 Animals can loosen the constraints of limited ranges of thermal tolerance by adjusting  
52 their behavior to facilitate thermoregulation. Such behavioral thermoregulation has a long history  
53 of study in biological research (Cowles & Bogert, 1944), but this idea still offers fresh insight  
54 today. Animals can restrict movement to produce less metabolic heat (Broders, Coombs, &  
55 McCarron, 2012; Stelzner, 1988), alter posture to reduce heat gain from insolation or increase  
56 surface area to shed heat (Bartholomew & Dawson, 1979; Luskick, Battersby, & Kelty, 1978),  
57 pant to lose heat via evaporation (Campos & Fedigan, 2009; McCann, Moen, & Harris, 2013), or  
58 visit thermal refugia (spaces that provide refuge from thermal stress caused by extreme  
59 temperatures [e.g., burrows, wallows, shade cover]; Hovick, Elmore, Allred, Fuhlendorf, &  
60 Dahlgren, 2014; Kurylyk, MacQuarrie, Linnansaari, Cunjak, & Curry, 2015; van Beest, Van  
61 Moorter, & Milner, 2012), among other behaviors. Identifying exactly which of these strategies  
62 animals use to behaviorally thermoregulate, how much these strategies buffer against adverse

63 impacts of hot weather, and what costs animals incur to use these strategies is crucial for  
64 understanding their ability to increase ranges of thermal tolerance.

65         Recent advances in statistical modeling techniques provide opportunity to study  
66 behavioral thermoregulation in new ways. Step-selection functions (hereafter “SSFs”) are a  
67 relatively recent extension of the resource selection function modeling framework that explicitly  
68 incorporates spatial and temporal animal movement characteristics to enable examination of  
69 fine-scale habitat selection and movement behavior at biologically realistic scales (Duchesne,  
70 Fortin, & Rivest, 2015; Forester, Im, & Rathouz, 2009; Thurfjell, Ciuti, & Boyce, 2014). SSFs  
71 have primarily been used to model habitat selection (Thurfjell et al., 2014), but recent theoretical  
72 development has demonstrated that they can also be used to explicitly model movement behavior  
73 that changes in both space and time in relation to landscape features (Avgar, Potts, Lewis, &  
74 Boyce, 2016; Ladle et al., 2019; Prokopenko, Boyce, & Avgar, 2017). By including interaction  
75 terms between temperature, habitat covariates, and movement rates within SSFs, temperature-  
76 dependent animal behaviors—including both resource selection and movement rates—can be  
77 explicitly quantified.

78         We evaluated behavioral thermoregulation using the SSF framework in moose (*Alces*  
79 *alces*), a well-known heat-sensitive species. Moose have undergone substantial population  
80 declines across much of their southern range due in part to climate change (Lenarz, Nelson,  
81 Schrage, & Edwards, 2009; Monteith et al., 2015; Rempel, 2011). Moose experience heat stress  
82 starting at temperatures as low as 14°C (Renecker & Hudson, 1986) or 17°C (McCann et al.,  
83 2013) during the summer. Moose prevent heat stress on hot days by using water, shade, and  
84 decreased activity to shed heat via conduction and reduced exposure to radiation from the sun  
85 (Belovsky, 1981; Broders et al., 2012; Dussault et al., 2004; McCann, Moen, Windels, & Harris,

86 2016; Street, Rodgers, & Fryxell, 2015). At coarse spatial and temporal scales, moose select for  
87 thermal cover (e.g., dense canopy in conifer forests) during periods of high temperatures  
88 (Demarchi & Bunnell, 1995; Melin et al., 2014; Schwab & Pitt, 1991; Street et al., 2016; van  
89 Beest et al., 2012; but see Lowe, Patterson, & Schaefer, 2010). However, earlier studies have not  
90 established the relative importance of multiple different heat amelioration strategies (e.g.,  
91 seeking shade vs. reducing movement vs. visiting water) or identified thresholds at which moose  
92 behavioral thermoregulation alters habitat selection.

93 To evaluate how moose modify fine-scale habitat selection and movement patterns as  
94 temperatures increase, we used an SSF to assess effects of temperature on movement and  
95 resource selection. We examined empirical support for a single model consisting of temperature  
96 and interactions with variables likely to be important for moose thermoregulation. This model  
97 enabled us to test three hypotheses on how moose alter behavior to thermoregulate when it is hot:  
98 (1) moose decrease movement rates to decrease metabolic heat production, (2) moose increase  
99 use of shade to decrease heat gain from solar radiation, or (3) increase use of water to increase  
100 heat loss via conduction, convection, and evaporation.

101

## 102 **2. Materials and Methods**

### 103 **2.1 Study area.**

104 We conducted our study in northeastern Minnesota, USA (Fig. 1). Federal, state, county,  
105 and tribal public lands managed for timber harvest and recreation make up >80% of property  
106 ownership in the area. The region is a sub-boreal transition zone between northern hardwood  
107 forests in the south to Canadian boreal forests in the north (Pastor & Mladenoff, 1992). Upland  
108 forests are primarily composed of white, red, and jack pine (*Pinus strobus*, *P. resinosa*, and *P.*

109 *banksiana*), aspen (*Populus tremuloides*), paper birch (*Betula papyrifera*), and balsam fir (*Abies*  
110 *balsamea*). Black spruce (*Picea mariana*), tamarack (*Larix laricina*), and northern white cedar  
111 (*Thuja occidentalis*) dominate wet lowland forests. Mean minimum and maximum temperatures,  
112 respectively, are -16.5°C and -5.5°C for the month of January and 12.6°C and 24.0°C for the  
113 month of July at the Beaver Bay weather station on the southern edge of our study area (National  
114 Oceanic and Atmospheric Administration). Snow cover is typically present from December to  
115 April, with mean annual snowfall ranging between 150 – 240 cm (Minnesota Department of  
116 Natural Resources).

117

## 118 **2.2 Animal Capture and GPS Telemetry**

119 We captured moose by darting them from helicopters (Quicksilver Air, Inc., Fairbanks,  
120 Alaska, USA) during the winters of 2011 and 2012. Darts used to sedate moose contained 1.2 ml  
121 (4.0 mg ml<sup>-1</sup>) carfentanil citrate and 1.2 ml (100 mg ml<sup>-1</sup>) xylazine HCl, and we used 7.2 ml (50  
122 mg ml<sup>-1</sup>) naltrexone HCl and 3 ml (5 mg ml<sup>-1</sup>) yohimbine HCl as antagonists (Lenarz et al.,  
123 2009; Roffe, Coffin, & Berger, 2001). We fitted immobilized moose with global positioning  
124 system (GPS) collars (Lotek Wireless, Inc., Newmarket, Ontario, Canada). Animal capture and  
125 handling protocols met American Society of Mammalogists recommended guidelines (Sikes &  
126 Animal Care and Use Committee of the American Society of Mammalogists, 2011) and were  
127 approved by the University of Minnesota Animal Care and Use Committee (Protocol Number:  
128 1309-30915A).

129 Collars were programmed to record locations every 20 minutes and to drop off moose at  
130 the end of expected battery life (2 years). We retained GPS locations with 3-D fixes or 2-D fixes  
131 with dilution of precision values  $\leq 5$  (Lewis, Rachlow, Garton, & Vierling, 2007) and removed

132 locations that were not biologically possible (i.e., removing locations where the distance between  
133 locations would have exceeded the distance a moose could have moved in a 20-minute period,  
134 assuming a maximum speed of 30-km/hour). Data used in this analysis include only locations  
135 between May 1 and September 31—dates that coincide with average daily maximum  
136 temperatures above the threshold believed to induce heat stress for moose (Renecker & Hudson,  
137 1986). Location and activity data within 2 weeks of death or collar failure were censored from  
138 our data, and only full months of data were used in analysis. One hundred fifty-three moose-  
139 months of 24 moose were used in final analysis.

140

### 141 **2.3 Model Covariates**

142 Because shade is difficult to directly calculate over large areas at fine scales and varies at  
143 any given location on daily and annual cycles, we used canopy vegetation density as a proxy for  
144 shade. Canopy vegetation density was estimated using airborne lidar data. Lidar is an active,  
145 laser-based remote sensing technology that provides detailed information on topography and  
146 vegetation structure (Davies & Asner, 2014; Vierling, Vierling, Gould, Martinuzzi, & Clawges,  
147 2008). Lidar data were collected over our entire study area during leaf-off conditions in May  
148 2011 as part of the Minnesota Elevation Mapping project (Minnesota Geospatial Information  
149 Office). Lidar data were collected from a fixed wing airplane at an altitude of 2,000-2,300 m  
150 above ground level using discrete-return laser scanning systems (ALS60, ALS70, or Optech  
151 GEMINI). Side overlap was 25% with a scan angle of  $\pm 20^\circ$ . Nominal point spacing and pulse  
152 density varied due to incomplete overlap of adjacent flight-lines. Average nominal pulse density  
153 was 1 pulse/m<sup>2</sup>. We calculated height of discrete returns above ground by subtracting ground  
154 elevation based on a lidar-derived Digital Elevation Model from the return elevation. Lidar data

155 met National Standard for Spatial Database Accuracy standards and had a vertical accuracy  
156 RMSE of 5.0 cm and a horizontal accuracy of 1.16 m.

157 We estimated canopy vegetation density as the proportion of all returns that were  $\geq 3$  m  
158 above ground. Lidar-derived canopy vegetation density estimates were summarized in a 30 x 30  
159 m grid that aligned with National Land Cover Database (NLCD) raster data to ensure  
160 consistency across data layers in GIS. We used FUSION software to create the lidar-derived  
161 canopy vegetation density raster (McGaughey, 2016). For the sake of simplicity, we hereafter  
162 refer to canopy vegetation density as “shade”.

163 Land cover types were determined using the 2011 National Land Cover Database  
164 (NLCD) (Homer et al., 2015). NLCD is a remotely sensed dataset of 16 land cover classes  
165 created from Landsat Thematic Mapper with 30 m spatial resolution. We extracted 5 vegetation  
166 cover types that may offer thermal refuge—woody wetland, hereafter called bog; emergent  
167 herbaceous wetland, hereafter called marsh; open water; conifer forests; and mixed forests. Each  
168 of these cover types offers different amounts of thermal refuge via different mechanisms (Table  
169 1). Each cover type also offers different amounts of forage. Since moose primarily eat the leaves  
170 of deciduous shrubs and saplings  $< 3$  m tall during summer, forage quantity decreases as the  
171 amount of shade and proportion of conifers increases. We calculated the distance of each pixel in  
172 our study area from each of our chosen land cover types using ArcMap 10.4 (Esri, Redlands,  
173 California, USA).

174 Temperature data used to define our study period were obtained from two weather  
175 stations within our study area (KBFW in Silver Bay and KCKC in Grand Marais; MesoWest),  
176 which report temperatures at 20-minute intervals. Moose locations were individually matched  
177 with the nearest weather station (by distance) and nearest temperature recording (by time).



178 Moose locations were on average 33 km from the nearest weather station and 7 mins from the  
179 closest recorded weather observation in time.

180

## 181 **2.4 Statistical Analysis**

182 We used a step-selection function (SSF) to model moose resource selection and  
183 movement behavior. For our SSF, we selected available points using a parameterized Weibull  
184 distribution of step lengths and the observed distribution of turn angles of the animals in our data  
185 set. We paired 20 available locations to each used location (i.e., 21 points per stratum). Our final  
186 data set contained 311,521 steps taken by 24 moose. We used conditional logistic regression to  
187 fit the SSF containing our variables of interest (listed in Table 1) and interactions between each  
188 variable and ambient temperature. We included step length (i.e., distance between consecutive  
189 fixes) both to reduce bias in selection estimates (Forester et al., 2009) and to explicitly model its  
190 interaction with another variable of interest (Avgar et al., 2016; Ladle et al., 2019; Prokopenko et  
191 al., 2017). Interaction coefficients detail how temperature influences step length and selection of  
192 cover types at differing temperatures. Because step lengths vary in a regular pattern over the  
193 course of each 24-hour period (Fig. A1), we adjusted step lengths prior to inclusion in the model  
194 by subtracting the observed step length from the average step length at each given time of day.  
195 Failure to adjust for crepuscular activity peaks could lead to consistent positive bias in movement  
196 rates at low (morning) and intermediate (evening) temperatures. We included one-way  
197 interactions between each covariate and temperature ( $^{\circ}\text{C}$ ). Because temperature was constant  
198 within strata, it was considered only as an interaction term. The full final model is listed below:

199

200 Use ~ Shade + dBog + dMarsh + dWater + dConifer + dMixed + StepLength + Temp\*Shade +  
201 Temp\*dBog + Temp\*dMarsh + Temp\*dWater + Temp\*dConifer + Temp\*dMixed +  
202 Temp\*StepLength,

203

204 where “\*” denotes interactions between variables. We used generalized estimating equations  
205 (GEEs) to obtain robust standard errors among animal-days that reduce Type I error caused by  
206 pseudoreplication (Craiu, Duchesne, & Fortin, 2008; Duchesne, Fortin, & Courbin, 2010; Fortin  
207 et al., 2005), and checked to ensure that VIFs between main effects were adequately low  
208 (Dormann et al., 2013). We then conducted k-fold (k=5) cross-validation on our final model and  
209 calculated Spearman rank correlation (mean of 50 replications) to evaluate model fit (based on  
210 the methods of Fortin et al., 2009). Finally, we rarified data to 1-, 2-, and 4-hour intervals to  
211 determine the minimum interval between GPS locations required to detect biologically  
212 significant interactions. All analyses were conducted using R statistical software (R Core Team,  
213 2018).

214

### 215 **3. Results**

#### 216 **3.1 Moose Movement and Resource Selection**

217 We found empirical support for four interaction terms (StepLength\*Temp, Shade\*Temp,  
218 Bog\*Temp, MixedForest\*Temp) in our step-selection function (Table 2), indicating that  
219 temperature significantly altered movement rate and selection for shade, bog, and mixed forest.  
220 We did not detect empirical support for interactions between temperature and distance to marsh,  
221 temperature and distance to open water, or temperature and distance to conifer forest. Of these  
222 variables with interaction terms whose 95% CIs overlapped zero, only the main effect for

223 distance to conifer forest was significant. Regardless of temperature, moose selected areas  
224 further from conifer forest (RSS = 1.553; 95% CI = 1.133-2.130). The main effects for distance  
225 to marsh and distance to open water were not significant. Moose neither selected nor avoided  
226 areas near marsh or open water.

227 Moose decreased movement rates at hotter temperatures (Fig. 2A). Mean standardized  
228 step length was below 0 m at all temperatures above 20°C. In other words, the mean step length  
229 at each temperature above 20°C was below the overall mean step length (controlling for time of  
230 day). At each standardized step length > 0 m (i.e., steps that were longer than average), the odds  
231 of moose taking a step of that length was higher at 0°C than at 15°C, and higher at 15°C than at  
232 30°C. At 0°C, the odds that moose would move 100 m more than average in 20 minutes were  
233 substantially higher (RSS = 1.074; 95% CI = 1.025-1.126) than at 15°C (RSS = 0.849; 95% CI =  
234 0.777-0.928), which were in turn substantially higher than at 30°C (RSS = 0.672; 95% CI =  
235 0.590-0.765).

236 Moose spent more time in shade at hotter temperatures (Fig. 2B). Relative selection  
237 strength increased with increasing vegetative cover at 30°C, while it decreased with increasing  
238 vegetative cover at 0°C and 15°C, indicating that moose sought shade at high temperatures while  
239 avoiding it at lower temperatures. At 0°C, the odds that moose would move into a pixel with  
240 75% vegetative cover were substantially lower (RSS = 0.265; 95% CI = 0.239-0.295) than at  
241 15°C (RSS = 0.640; 95% CI = 0.523-0.782), which were in turn substantially lower than at 30°C  
242 (RSS = 1.542; 95% CI = 1.148-2.073).

243 Despite avoiding bogs at colder temperatures, moose traveled closer to bogs at hotter  
244 temperatures (Fig. 2C). The odds that moose were far from bogs was higher at 0°C (RSS =

245 1.407; 95% CI = 1.177-1.681 at 500 m) than at 15°C (RSS = 0.818; 95% CI = 0.577-1.160 at 500  
246 m), and higher at 15°C than at 30°C (RSS = 0.476; 95% CI = 0.283-0.800 at 500 m).

247 Moose selected for shorter distances to mixed forest when it was hot than when it was  
248 cold (Fig. 2D). The odds that moose were far from mixed forest was higher at 0°C (RSS = 1.064;  
249 95% CI = 0.888-1.274 at 500 m) than at 15°C (RSS = 0.795; 95% CI = 0.560-1.127 at 500 m) or  
250 30°C (RSS = 0.594; 95% CI = 0.353-0.998 at 500 m), though odds did not significantly differ  
251 between 15°C and 30°C.

252

### 253 **3.2 Model validation**

254 K-fold cross-validation of our model demonstrated that our model was substantially better than  
255 random at predicting where moose moved—the mean Spearman rank correlation coefficient was  
256 0.47 for observed steps.

257

### 258 **3.3 Effects of temporal scale on interactions**

259 The interactions we found in our data diminish substantially if GPS locations are rarified so that  
260 locations occur at longer intervals. If our 20-min GPS data are rarified to 1-hr, 2-hr, and 4-hr  
261 intervals and used to fit the same SSF, interactions become progressively less biologically  
262 meaningful (Fig. A2). As the intervals increase, differences across temperatures for step length,  
263 shade, and distance to bog become minimal. Differences across temperatures for distance to  
264 mixed forest shrink, but more gradually. This pattern of weakening interactions as intervals  
265 between GPS locations increase indicates that fine-scale data may be required to detect  
266 behavioral mitigation strategies by moose using step-selection functions.

267

## 268 4. Discussion

269 Moose altered both movement and habitat selection to behaviorally thermoregulate  
270 during hot periods. Moose reduced movement and increased use of shade, bogs, and mixed forest  
271 at high heat, even while avoiding shade and bogs at cooler temperatures (Fig. 2). This pattern  
272 links previous findings of separate studies. First, moose prefer to forage in areas with low canopy  
273 cover because canopy cover is generally inversely related to forage availability (Lone et al.,  
274 2014). Second, moose prefer to use bed sites under dense forest canopy in wet lowland forests  
275 during the day (McCann et al., 2016), where moose have access to less forage but more  
276 protection against heat gain from solar radiation and more capacity to lose heat to the ground via  
277 conduction. Moose therefore face a steep tradeoff during periods of heat—areas that are good for  
278 foraging are not good for avoiding heat. Selection for shade and shorter step lengths as  
279 temperatures increase indicates that moose forego foraging in favor of bedding down under  
280 shade as temperatures increase. Earlier studies have documented moose shifting activity to  
281 cooler evenings and nights on hot days (Dussault et al., 2004; Montgomery et al., 2019), which is  
282 consistent with this trade-off.

283 The vegetation cover types used more by moose during warm weather further indicate  
284 that moose face a tradeoff between foraging and thermoregulation during periods of heat. In  
285 general, moose are more likely to find greater quantities of forage in cover types that do not  
286 provide thermal cover, while cover types that provide thermal cover are less likely to provide  
287 forage. For example, upland mixed forest has some available forage, but forage availability is  
288 highest in this cover type in young forests with little canopy cover. Similarly, bogs in Minnesota  
289 are largely populated by black spruce, tamarack, and alder, all of which can provide thermal  
290 cover but are unpalatable for moose. Birch (*Betula* spp.) and willow (*Salix* spp.) are more

291 palatable and occasionally grow in bogs in Minnesota, but rarely at densities high enough to  
292 compensate for unpalatable species dominating the canopy layer.

293         During hot weather, moose used shade far more than water to ameliorate heat. Moose are  
294 commonly observed in bodies of water, and anecdotal evidence suggests that moose use water to  
295 shed heat (Demarchi & Bunnell, 1995; Schwab & Pitt, 1991). Our analysis, however, indicates  
296 that moose do not often use open water and marsh to mitigate heat stress; they prefer to seek  
297 shadier land cover types. Nevertheless, they do increase use of woody bogs—where both shade  
298 and some water are usually available—as temperatures increase. This is consistent with a  
299 previous study (McCann et al., 2016) that found that moose prefer bed sites with both canopy  
300 cover and relatively high soil moisture.

301         Frequent GPS locations enabled us to detect this pattern and may explain why previous  
302 attempts to characterize moose movement patterns failed to reveal a clean relationship between  
303 temperature and movement rates (Dussault et al., 2004; Montgomery et al., 2019). Moose spend  
304 about half of their day foraging during the summer, with foraging bouts interspersed by periods  
305 of rumination at bed sites. Periods of rest and rumination are typically distinct and occur at  
306 regular intervals of roughly 2 hours (Moen, Pastor, Cohen, & Schwartz, 1996; Renecker &  
307 Hudson, 1989). As the interval between GPS locations increases, the chance that both  
308 ambulatory foraging bouts and stationary ruminating bouts are aggregated into a single GPS fix  
309 increases, which homogenizes step lengths (Moen et al., 1996). Frequent GPS locations reduce  
310 the probability of this happening. Indeed, if our location data is rarified to 1-, 2-, and 4-hour  
311 intervals, interactions between temperature and movement rates are progressively reduced (Fig.  
312 A2). Because many species have idiosyncratic movement behaviors, movement studies may

313 require intervals between GPS locations within a specific range to answer some research  
314 questions.

315         Our analysis can directly inform management and conservation actions for wildlife.  
316 Moose populations at the southern edge of their distribution (including our study area) have  
317 undergone dramatic declines in the past decade. Our results suggest that in a warmer future  
318 proximity to shade will strongly influence habitat suitability for moose in areas with abundant  
319 forage due to timber harvest and other anthropogenic disturbance. Moose will likely benefit from  
320 management action to explicitly promote maintenance of shade near large patches of forage.  
321 Because moose prioritize shade over forage when it is hot, moose will likely not feed in large  
322 forest openings on hot days (though moose may feed in unshaded forest openings at night  
323 [Dussault et al., 2004]). Moose will likely spend more time foraging in forest openings with  
324 patches of canopy cover than in large homogeneous forest openings. For example, most of the  
325 forage in large clearcuts may be inaccessible to moose during hot periods unless the clearcuts  
326 contain “reserve patches”, or interior islands or fingers of forest extending into the clearcut.  
327 These reserve patches will likely be most helpful for moose if they consist of bog or mixed  
328 forest.

329         Because we did not measure fitness or any proxy for it, it remains unclear how effective  
330 these behavioral strategies will be at reducing population declines under climate change.  
331 Although behavioral thermoregulation mitigates some metabolic costs of hot weather, forgoing  
332 foraging to avoid high body temperatures may result in decreased fat reserves, lower fitness, and  
333 ultimately in population declines compared to a cooler baseline scenario where moose do not  
334 need to behaviorally thermoregulate. However, identifying patterns of behavior allows  
335 researchers to explicitly test for fitness consequences in subsequent studies. For example,

336 identification of “green wave surfing” behavior (by which animals migrate along paths of rapidly  
337 greening forage) in migratory ungulates (Aikens et al., 2017; Merkle et al., 2016) allowed  
338 researchers to later show that better green wave surfers had higher body fat and increased  
339 reproductive success (Middleton et al., 2018). Our study could be used as a foundation for  
340 further analyses along these lines, or to parameterize mechanistic models of moose energetic  
341 balances under various climate scenarios, land management strategies, or disturbance regimes to  
342 project the outcomes of conservation actions taken to benefit moose. Future studies should  
343 characterize fitness consequences associated with reduced movement and increased time spent in  
344 areas with low forage availability during warm periods.

345         Our analysis demonstrates that advances in animal tracking, remote sensing, and  
346 modelling techniques allow us to study responses by free-ranging animals to weather in the field  
347 at finer scales than previously possible. SSFs in particular are a valuable tool to answer questions  
348 concerning behavioral responses by free-ranging animals to changes in weather in a relatively  
349 simple and intuitive way. Because SSFs estimate selection conditionally at each GPS location,  
350 each location or step can be connected with a distinct time and spatial location, enabling  
351 inference on how animals change movement and habitat selection behavior in space and time in  
352 response to specific stimuli. SSFs have been used to characterize animal movements in relation  
353 to landscape features, such as grizzly bear response to human activity (Ladle et al., 2019) and elk  
354 and African wild dog response to roads (Abrahms et al., 2016; Prokopenko et al., 2017).  
355 Likewise, SSFs can characterize changes in movement behavior and habitat use in response to  
356 differences in temperature. Similar analyses will be increasingly important on a warming planet,  
357 and continued advances in animal tracking and remote sensing technologies will allow us to  
358 study such behavior at finer scales and for many more species than have been studied in the past.



359           In conclusion, moose altered both movement and habitat selection to behaviorally  
360 thermoregulate during hot periods by reducing movement rates and increasing use of shaded  
361 vegetation cover types that they avoid at cooler temperatures. Moose did not regularly use water  
362 sources that lack canopy cover to shed heat. Moose face a tradeoff between forage and thermal  
363 cover at high temperatures and forego foraging in favor of seeking thermal cover. Behavior  
364 changed at thresholds near (though somewhat above) previously documented heat stress  
365 thresholds (McCann et al., 2013; Renecker & Hudson, 1986): step lengths decreased at  
366 temperatures above 20°C, and selection patterns for shade cover reversed above 15°C. Future  
367 research characterizing strategies for behavioral thermoregulation and consequences of those  
368 strategies for fitness will aid conservation in a warming world, for both moose and other heat-  
369 sensitive species.

370

## 371 **Acknowledgements**

372 Many thanks to B. Olson, W. Chen, and others who helped collect field data, as well as J. Rick,  
373 B. Brito, F. Molina, B. Maitland, S. Esmaeili, and J. Goheen for providing helpful comments on  
374 pre-submission drafts of this manuscript. This study was funded by Minnesota's Clean Water,  
375 Land, and Legacy Amendment, USGS-NPS Natural Resources Preservation Protection fund,  
376 Voyageurs National Park, Minnesota's Environmental and Natural Resources Trust Fund, the  
377 University of Minnesota-Duluth Integrated Biosciences graduate program, and the University of  
378 Wyoming Department of Zoology and Physiology.

379

## 380 **Author Contributions**

381 JA and RM conceived and designed the study; RM collected the data; JA, MJ, and JM analysed  
382 the data; JA led the writing of the manuscript. All authors contributed critically to manuscript  
383 drafts and gave final approval for publication.

384

### 385 **Data Availability**

386 Data and R scripts will be archived on *Zenodo* when this manuscript is accepted for publication.

387

### 388 **References**

389 Abrahms, B., Jordan, N. R., Golabek, K. A., McNutt, J. W., Wilson, A. M., & Brashares, J. S.

390 (2016). Lessons from integrating behaviour and resource selection: activity-specific

391 responses of African wild dogs to roads. *Animal Conservation*, 19(3), 247–255. doi:

392 10.1111/acv.12235

393 Aikens, E. O., Kauffman, M. J., Merkle, J. A., Dwinnell, S. P. H., Fralick, G. L., & Monteith, K.

394 L. (2017). The greenscape shapes surfing of resource waves in a large migratory

395 herbivore. *Ecology Letters*, 20(6), 741–750. doi: 10.1111/ele.12772

396 Avgar, T., Potts, J. R., Lewis, M. A., & Boyce, M. S. (2016). Integrated step selection analysis:

397 bridging the gap between resource selection and animal movement. *Methods in Ecology*

398 and Evolution, 7(5), 619–630. doi: 10.1111/2041-210X.12528

399 Bartholomew, G. A., & Dawson, W. R. (1979). Thermoregulatory behavior during incubation in

400 Heermann's gulls. *Physiological Zoology*, 52(4), 422–437. doi:

401 10.1086/physzool.52.4.30155934

402 Belovsky, G. E. (1981). Optimal activity times and habitat choice of moose. *Oecologia*, 48(1),

403 22–30. doi: 10.1007/BF00346984

- 404 Boyles, J. G., Seebacher, F., Smit, B., & McKechnie, A. E. (2011). Adaptive thermoregulation in  
405 endotherms may alter responses to climate change. *Integrative and Comparative Biology*,  
406 51(5), 676–690. doi: 10.1093/icb/icr053
- 407 Broders, H. G., Coombs, A. B., & McCarron, J. R. (2012). Ecothermic responses of moose  
408 (*Alces alces*) to thermoregulatory stress on mainland Nova Scotia. *Alces*, 48(0), 53–61.
- 409 Campos, F. A., & Fedigan, L. M. (2009). Behavioral adaptations to heat stress and water scarcity  
410 in white-faced capuchins (*Cebus capucinus*) in Santa Rosa National Park, Costa Rica.  
411 *American Journal of Physical Anthropology*, 138(1), 101–111. doi: 10.1002/ajpa.20908
- 412 Cowles, R. B., & Bogert, C. M. (1944). A preliminary study of the thermal requirements of  
413 desert reptiles. *Bulletin of the American Museum of Natural History*, 83, 261–296.
- 414 Craiu, R. V., Duchesne, T., & Fortin, D. (2008). Inference methods for the conditional logistic  
415 regression model with longitudinal data. *Biometrical Journal*, 50(1), 97–109. doi:  
416 10.1002/bimj.200610379
- 417 Davies, A. B., & Asner, G. P. (2014). Advances in animal ecology from 3D-LiDAR ecosystem  
418 mapping. *Trends in Ecology & Evolution*, 29(12), 681–691. doi:  
419 10.1016/j.tree.2014.10.005
- 420 Demarchi, M. W., & Bunnell, F. L. (1995). Forest cover selection and activity of cow moose in  
421 summer. *Acta Theriologica*, 40, 23–36.
- 422 Dormann, C. F., Elith, J., Bacher, S., Buchmann, C., Carl, G., Carré, G., ... Lautenbach, S.  
423 (2013). Collinearity: a review of methods to deal with it and a simulation study  
424 evaluating their performance. *Ecography*, 36(1), 27–46. doi: 10.1111/j.1600-  
425 0587.2012.07348.x

- 426 Duchesne, T., Fortin, D., & Courbin, N. (2010). Mixed conditional logistic regression for habitat  
427 selection studies. *Journal of Animal Ecology*, 79(3), 548–555. doi: 10.1111/j.1365-  
428 2656.2010.01670.x
- 429 Duchesne, T., Fortin, D., & Rivest, L.-P. (2015). Equivalence between step selection functions  
430 and biased correlated random walks for statistical inference on animal movement. *PLOS*  
431 *ONE*, 10(4), e0122947. doi: 10.1371/journal.pone.0122947
- 432 Dussault, C., Ouellet, J.-P., Courtois, R., Huot, J., Breton, L., & Larochelle, J. (2004).  
433 Behavioural responses of moose to thermal conditions in the boreal forest. *Écoscience*,  
434 11(3), 321–328.
- 435 Forester, J. D., Im, H. K., & Rathouz, P. J. (2009). Accounting for animal movement in  
436 estimation of resource selection functions: sampling and data analysis. *Ecology*, 90(12),  
437 3554–3565. doi: 10.1890/08-0874.1
- 438 Fortin, D., Beyer, H. L., Boyce, M. S., Smith, D. W., Duchesne, T., & Mao, J. S. (2005). Wolves  
439 influence elk movements: behavior shapes a trophic cascade in Yellowstone National  
440 Park. *Ecology*, 86(5), 1320–1330. doi: 10.1890/04-0953
- 441 Fortin, D., Fortin, M.-E., Beyer, H. L., Duchesne, T., Courant, S., & Dancose, K. (2009). Group-  
442 size-mediated habitat selection and group fusion–fission dynamics of bison under  
443 predation risk. *Ecology*, 90(9), 2480–2490. doi: 10.1890/08-0345.1
- 444 Hoegh-Guldberg, O., & Bruno, J. F. (2010). The impact of climate change on the world’s marine  
445 ecosystems. *Science*, 328(5985), 1523–1528. doi: 10.1126/science.1189930
- 446 Homer, C., Dewitz, J., Yang, L., Jin, S., Danielson, P., Xian, G., ... Megown, K. (2015).  
447 Completion of the 2011 National Land Cover Database for the conterminous United

- 448 States—representing a decade of land cover change information. *Photogrammetric*  
449 *Engineering & Remote Sensing*, 81(5), 345–354.
- 450 Hovick, T. J., Elmore, R. D., Allred, B. W., Fuhlendorf, S. D., & Dahlgren, D. K. (2014).  
451 Landscapes as a moderator of thermal extremes: a case study from an imperiled grouse.  
452 *Ecosphere*, 5(3), 1–12. doi: 10.1890/ES13-00340.1
- 453 Kurylyk, B. L., MacQuarrie, K. T. B., Linnansaari, T., Cunjak, R. A., & Curry, R. A. (2015).  
454 Preserving, augmenting, and creating cold-water thermal refugia in rivers: concepts  
455 derived from research on the Miramichi River, New Brunswick (Canada). *Ecohydrology*,  
456 8(6), 1095–1108. doi: 10.1002/eco.1566
- 457 Ladle, A., Avgar, T., Wheatley, M., Stenhouse, G. B., Nielsen, S. E., & Boyce, M. S. (2019).  
458 Grizzly bear response to spatio-temporal variability in human recreational activity.  
459 *Journal of Applied Ecology*, 56(2), 375–386. doi: 10.1111/1365-2664.13277
- 460 Lenarz, M. S., Nelson, M. E., Schrage, M. W., & Edwards, A. J. (2009). Temperature mediated  
461 moose survival in northeastern Minnesota. *Journal of Wildlife Management*, 73(4), 503–  
462 510. doi: 10.2193/2008-265
- 463 Lewis, J. S., Rachlow, J. L., Garton, E. O., & Vierling, L. A. (2007). Effects of habitat on GPS  
464 collar performance: using data screening to reduce location error. *Journal of Applied*  
465 *Ecology*, 44(3), 663–671. doi: 10.1111/j.1365-2664.2007.01286.x
- 466 Lone, K., Beest, F. M. van, Mysterud, A., Gobakken, T., Milner, J. M., Ruud, H.-P., & Loe, L. E.  
467 (2014). Improving broad scale forage mapping and habitat selection analyses with  
468 airborne laser scanning: the case of moose. *Ecosphere*, 5(11), art144. doi: 10.1890/ES14-  
469 00156.1

- 470 Lowe, S. J., Patterson, B. R., & Schaefer, J. A. (2010). Lack of behavioral responses of moose  
471 (*Alces alces*) to high ambient temperatures near the southern periphery of their range.  
472 Canadian Journal of Zoology, 88(10), 1032–1041. doi: 10.1139/Z10-071
- 473 Luskick, S., Battersby, B., & Kelty, M. (1978). Behavioral thermoregulation: orientation toward  
474 the sun in herring gulls. Science, 200(4337), 81–83. doi: 10.1126/science.635577
- 475 McCann, N. P., Moen, R. A., Windels, S. K., & Harris, T. R. (2016). Bed sites as thermal refuges  
476 for a cold-adapted ungulate in summer. Wildlife Biology, 22(5), 228–237. doi:  
477 10.2981/wlb.00216
- 478 McCann, N. P., Moen, R. A., & Harris, T. R. (2013). Warm-season heat stress in moose (*Alces*  
479 *alces*). Canadian Journal of Zoology, 91(12), 893–898. doi: 10.1139/cjz-2013-0175
- 480 McGaughey, R. J. (2016). FUSION/LDV: Software for LIDAR data analysis and visualization  
481 (No. 3.6). Seattle, WA, USA: US Department of Agriculture, Forest Service, Pacific  
482 Northwest Research Station.
- 483 Melin, M., Matala, J., Mehtätalo, L., Tiilikainen, R., Tikkanen, O.-P., Maltamo, M., ... Packalen,  
484 P. (2014). Moose (*Alces alces*) reacts to high summer temperatures by utilizing thermal  
485 shelters in boreal forests – an analysis based on airborne laser scanning of the canopy  
486 structure at moose locations. Global Change Biology, 20(4), 1115–1125. doi:  
487 10.1111/gcb.12405
- 488 Merkle, J. A., Monteith, K. L., Aikens, E. O., Hayes, M. M., Hersey, K. R., Middleton, A. D., ...  
489 Kauffman, M. J. (2016). Large herbivores surf waves of green-up during spring.  
490 Proceedings of the Royal Society B: Biological Sciences, 283(1833), 20160456. doi:  
491 10.1098/rspb.2016.0456

492 MesoWest. (2018). Retrieved April 27, 2018, from [http://mesowest.utah.edu/cgi-](http://mesowest.utah.edu/cgi-bin/droman/mesomap.cgi?state=MN&rawsflag=3)  
493 [bin/droman/mesomap.cgi?state=MN&rawsflag=3](http://mesowest.utah.edu/cgi-bin/droman/mesomap.cgi?state=MN&rawsflag=3)

494 Middleton, A. D., Merkle, J. A., McWhirter, D. E., Cook, J. G., Cook, R. C., White, P. J., &  
495 Kauffman, M. J. (2018). Green-wave surfing increases fat gain in a migratory ungulate.  
496 *Oikos*, 127(7), 1060–1068. doi: 10.1111/oik.05227

497 Minnesota Department of Natural Resources. (2018). Retrieved April 27, 2018, from Minnesota  
498 Normal annual snowfall: 1981-2010 website:  
499 [https://www.dnr.state.mn.us/climate/summaries\\_and\\_publications/normals\\_snow\\_1981\\_](https://www.dnr.state.mn.us/climate/summaries_and_publications/normals_snow_1981_2010.html)  
500 [2010.html](https://www.dnr.state.mn.us/climate/summaries_and_publications/normals_snow_1981_2010.html)

501 Minnesota Geospatial Information Office. (2018). Retrieved April 27, 2018, from  
502 [http://www.mngeo.state.mn.us/committee/elevation/mn\\_elev\\_mapping.html](http://www.mngeo.state.mn.us/committee/elevation/mn_elev_mapping.html)

503 Moen, R., Pastor, J., Cohen, Y., & Schwartz, C. C. (1996). Effects of moose movement and  
504 habitat use on GPS collar performance. *Journal of Wildlife Management*, 60(3), 659–668.  
505 doi: 10.2307/3802085

506 Monteith, K. L., Klaver, R. W., Hersey, K. R., Holland, A. A., Thomas, T. P., & Kauffman, M. J.  
507 (2015). Effects of climate and plant phenology on recruitment of moose at the southern  
508 extent of their range. *Oecologia*, 178(4), 1137–1148. doi: 10.1007/s00442-015-3296-4

509 Montgomery, R. A., Redilla, K. M., Moll, R. J., Van Moorter, B., Rolandsen, C. M., Millspaugh,  
510 J. J., & Solberg, E. J. (2019). Movement modeling reveals the complex nature of the  
511 response of moose to ambient temperatures during summer. *Journal of Mammalogy*,  
512 100(1), 169–177. doi: 10.1093/jmammal/gyy185

- 513 National Oceanic and Atmospheric Administration. (2018). Retrieved April 27, 2018, from Data  
514 Tools: 1981-2010 Normals website: <https://www.ncdc.noaa.gov/cdo->  
515 [web/datatools/normals](https://www.ncdc.noaa.gov/cdo-web/datatools/normals)
- 516 Parmesan, C. (2006). Ecological and evolutionary responses to recent climate change. *Annual*  
517 *Review of Ecology, Evolution, and Systematics*, 37(1), 637–669. doi:  
518 10.1146/annurev.ecolsys.37.091305.110100
- 519 Pastor, J., & Mladenoff, D. J. (1992). The southern boreal-northern hardwood forest border: a  
520 systems analysis of the global boreal forest. Cambridge, UK: Cambridge University  
521 Press.
- 522 Pörtner, H. O., & Farrell, A. P. (2008). Physiology and climate change. *Science*, 322(5902),  
523 690–692. doi: 10.1126/science.1163156
- 524 Prokopenko, C. M., Boyce, M. S., & Avgar, T. (2017). Characterizing wildlife behavioural  
525 responses to roads using integrated step selection analysis. *Journal of Applied Ecology*,  
526 54(2), 470–479. doi: 10.1111/1365-2664.12768
- 527 R Core Team. (2018). R: A language and environment for statistical computing. Retrieved from  
528 <https://www.R-project.org/>
- 529 Rempel, R. S. (2011). Effects of climate change on moose populations: exploring the response  
530 horizon through biometric and systems models. *Ecological Modelling*, 222(18), 3355–  
531 3365. doi: 10.1016/j.ecolmodel.2011.07.012
- 532 Renecker, L. A., & Hudson, R. J. (1986). Seasonal energy expenditures and thermoregulatory  
533 responses of moose. *Canadian Journal of Zoology*, 64(2), 322–327. doi: 10.1139/z86-052
- 534 Renecker, L. A., & Hudson, R. J. (1989). Seasonal activity budgets of moose in aspen-dominated  
535 boreal forests. *Journal of Wildlife Management*, 53(2), 296–302. doi: 10.2307/3801126



- 536 Roffe, T. J., Coffin, K., & Berger, J. (2001). Survival and immobilizing moose with carfentanil  
537 and xylazine. *Wildlife Society Bulletin*, 29(4), 1140–1146.
- 538 Schwab, F. E., & Pitt, M. D. (1991). Moose selection of canopy cover types related to operative  
539 temperature, forage, and snow depth. *Canadian Journal of Zoology*, 69(12), 3071–3077.  
540 doi: 10.1139/z91-431
- 541 Sikes, R. S., & Animal Care and Use Committee of the American Society of Mammalogists.  
542 (2011). 2011 guidelines of the American Society of Mammalogists for the use of wild  
543 mammals in research and education. *Journal of Mammalogy*, 92(1), 235–253. doi:  
544 10.1093/jmammal/gyw078
- 545 Stelzner, J. K. (1988). Thermal effects on movement patterns of yellow baboons. *Primates*,  
546 29(1), 91–105. doi: 10.1007/BF02380852
- 547 Street, G. M., Fieberg, J., Rodgers, A. R., Carstensen, M., Moen, R., Moore, S. A., ... Forester, J.  
548 D. (2016). Habitat functional response mitigates reduced foraging opportunity:  
549 implications for animal fitness and space use. *Landscape Ecology*, 31(9), 1939–1953.  
550 doi: 10.1007/s10980-016-0372-z
- 551 Street, G. M., Rodgers, A. R., & Fryxell, J. M. (2015). Mid-day temperature variation influences  
552 seasonal habitat selection by moose. *Journal of Wildlife Management*, 79(3), 505–512.  
553 doi: 10.1002/jwmg.859
- 554 Sunday, J. M., Bates, A. E., Kearney, M. R., Colwell, R. K., Dulvy, N. K., Longino, J. T., &  
555 Huey, R. B. (2014). Thermal-safety margins and the necessity of thermoregulatory  
556 behavior across latitude and elevation. *Proceedings of the National Academy of Sciences*,  
557 201316145. doi: 10.1073/pnas.1316145111

- 558 Thurfjell, H., Ciuti, S., & Boyce, M. S. (2014). Applications of step-selection functions in  
559 ecology and conservation. *Movement Ecology*, 2(1), 4. doi: 10.1186/2051-3933-2-4
- 560 van Beest, F. M., Van Moorter, B., & Milner, J. M. (2012). Temperature-mediated habitat use  
561 and selection by a heat-sensitive northern ungulate. *Animal Behaviour*, 84(3), 723–735.  
562 doi: 10.1016/j.anbehav.2012.06.032
- 563 Vierling, K. T., Vierling, L. A., Gould, W. A., Martinuzzi, S., & Clawges, R. M. (2008). Lidar:  
564 shedding new light on habitat characterization and modeling. *Frontiers in Ecology and  
565 the Environment*, 6(2), 90–98. doi: 10.1890/070001
- 566 Walther, G.-R., Post, E., Convey, P., Menzel, A., Parmesan, C., Beebee, T. J. C., ... Bairlein, F.  
567 (2002). Ecological responses to recent climate change. *Nature*, 416(6879), 389–395. doi:  
568 10.1038/416389a
- 569

570 **Figures**

571 Fig. 1. The physical characteristics of the surrounding environment greatly influence the thermal landscape for animals. Fig. 1A  
572 represents an environment (conifer forest) where heat gain may be decreased by reducing exposure to radiation, Fig. 1B represents an  
573 environment (marsh) where heat loss may be increased by conduction, and Fig. 1C represents an environment (clear cut) that offers  
574 neither relief from radiation nor opportunities to disperse heat via conduction. Moose likely face tradeoffs between forage availability  
575 and thermal relief.

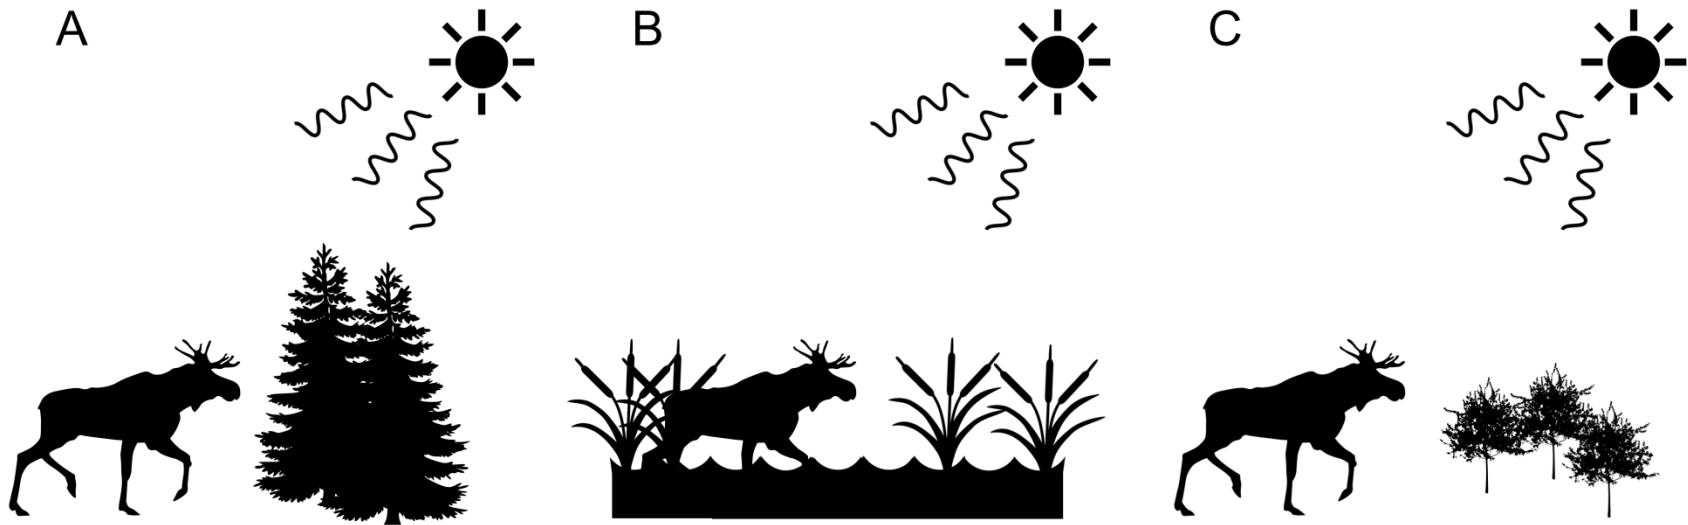

576

577

578 Fig. 2. Interaction plots showing relationships for significant interactions between temperature and relative selection strengths (RSS)  
579 of variables of interest (A: Step length and temperature, B: Shade and temperature, C: Distance to bog and temperature, D: Distance to  
580 mixed forest and temperature). High temperatures decrease the odds of longer step lengths, increase the odds of seeking shade, and  
581 increase the odds of traveling in bogs and mixed forest. In some cases (A, B, and C), patterns of behavior at low temperatures reversed  
582 into patterns of the opposite behavior at high temperatures (e.g., moose strongly avoid shade at 0°C while strongly selecting for shade  
583 at 30°C).

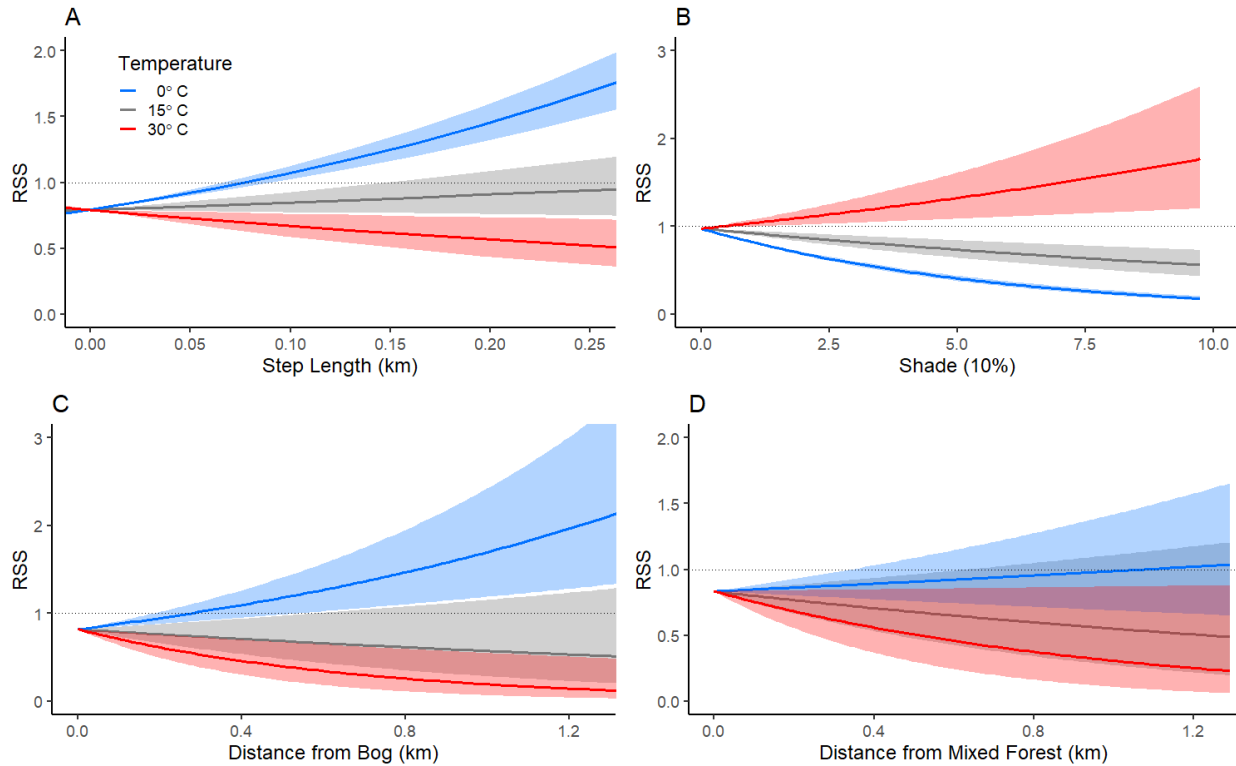

584

585 **Tables**

586 Table 1. Variables incorporated in the step-selection function of moose movement and habitat selection and justification for inclusion  
 587 in the model.

| <b>Name</b> | <b>Variable</b>            | <b>Description</b>                                                                                                                                                                                                                                         |
|-------------|----------------------------|------------------------------------------------------------------------------------------------------------------------------------------------------------------------------------------------------------------------------------------------------------|
| Shade       | Canopy Vegetation Density  | Proportion of all lidar returns above 3 meters; analogous to canopy vegetation density, a proxy for shade                                                                                                                                                  |
| dBog        | Distance to Bog            | Distance to woody wetlands; included in analyses because bogs have both canopy cover and ground moisture                                                                                                                                                   |
| dMarsh      | Distance to Marsh          | Distance to emergent herbaceous wetlands; included in analyses because moose are often observed in marshes, and water can disperse heat via conduction, convection, and evaporation                                                                        |
| dWater      | Distance to Open Water     | Distance to open water; included in analyses because moose are often seen in bodies of water, which can disperse heat via conduction, convection, and evaporation                                                                                          |
| dConifer    | Distance to Conifer Forest | Distance to conifer forest; included in analyses because conifer forest contains localized thick canopy cover                                                                                                                                              |
| dMixed      | Distance to Mixed Forest   | Distance to mixed forest; included in analyses because conifers offer localized thick canopy cover while deciduous trees offer foraging opportunities                                                                                                      |
| StepLength  | Step Length                | Distance between a moose location and the location immediately prior; included in analyses to account for bias in the parametric distribution of step lengths used to characterize available points and to estimate how temperature affects movement rates |
| Temp        | Temperature                | Temperature at the nearest NOAA weather station at the time of a location; included in analyses to estimate how temperature affects habitat use and movement rates                                                                                         |

Table 2. Coefficient estimates, standard errors, relative selection strengths, 95% confidence intervals, and p-values for the step-selection function. Bold variables denote significance at  $\alpha = 0.05$ .

| <i>Variable</i>        | <i>Coefficient</i> | <i>Robust SE</i> | <i>RSS</i>    | <i>RSS LCL</i> | <i>RSS UCL</i> | <i>p</i>         |
|------------------------|--------------------|------------------|---------------|----------------|----------------|------------------|
| <b>Shade</b>           | <b>-0.174</b>      | <b>0.007</b>     | <b>0.840</b>  | <b>0.829</b>   | <b>0.852</b>   | <b>&lt;0.001</b> |
| <b>dBog</b>            | <b>0.728</b>       | <b>0.182</b>     | <b>2.071</b>  | <b>1.450</b>   | <b>2.956</b>   | <b>&lt;0.001</b> |
| dMarsh                 | -0.055             | 0.108            | 0.947         | 0.767          | 1.169          | 0.612            |
| dWater                 | 0.057              | 0.106            | 1.058         | 0.860          | 1.302          | 0.592            |
| <b>dConifer</b>        | <b>0.440</b>       | <b>0.161</b>     | <b>1.553</b>  | <b>1.133</b>   | <b>2.130</b>   | <b>0.006</b>     |
| dMixed                 | 0.169              | 0.184            | 1.184         | 0.825          | 1.699          | 0.359            |
| <b>StepLength</b>      | <b>3.025</b>       | <b>0.242</b>     | <b>20.603</b> | <b>12.831</b>  | <b>33.082</b>  | <b>&lt;0.001</b> |
| <b>Shade*Temp</b>      | <b>0.008</b>       | <b>0.000</b>     | <b>1.008</b>  | <b>1.007</b>   | <b>1.009</b>   | <b>&lt;0.001</b> |
| <b>dBog*Temp</b>       | <b>-0.072</b>      | <b>0.012</b>     | <b>0.930</b>  | <b>0.909</b>   | <b>0.952</b>   | <b>&lt;0.001</b> |
| dMarsh*Temp            | 0.004              | 0.007            | 1.004         | 0.990          | 1.019          | 0.558            |
| dWater*Temp            | -0.004             | 0.007            | 0.996         | 0.982          | 1.010          | 0.589            |
| dConifer*Temp          | -0.009             | 0.010            | 0.991         | 0.972          | 1.011          | 0.388            |
| <b>dMixed*Temp</b>     | <b>-0.039</b>      | <b>0.012</b>     | <b>0.962</b>  | <b>0.940</b>   | <b>0.984</b>   | <b>0.001</b>     |
| <b>StepLength*Temp</b> | <b>-0.156</b>      | <b>0.014</b>     | <b>0.855</b>  | <b>0.832</b>   | <b>0.879</b>   | <b>&lt;0.001</b> |

## Appendix A: Supplementary Data

Fig. A1. Lowess regression of mean step length across times of day (20 min. increments). The gray ribbon represents the 95% confidence interval for the regression line. Moose movement rates varied slightly but consistently over the course of the day, with movement rates peaking during crepuscular periods. The area within the dotted rectangles represents the range of civil sunrise and sunset at the centroid of our study area during our study period (determined using the NOAA Solar Calculator tool [<https://www.esrl.noaa.gov/gmd/grad/solcalc/>]).

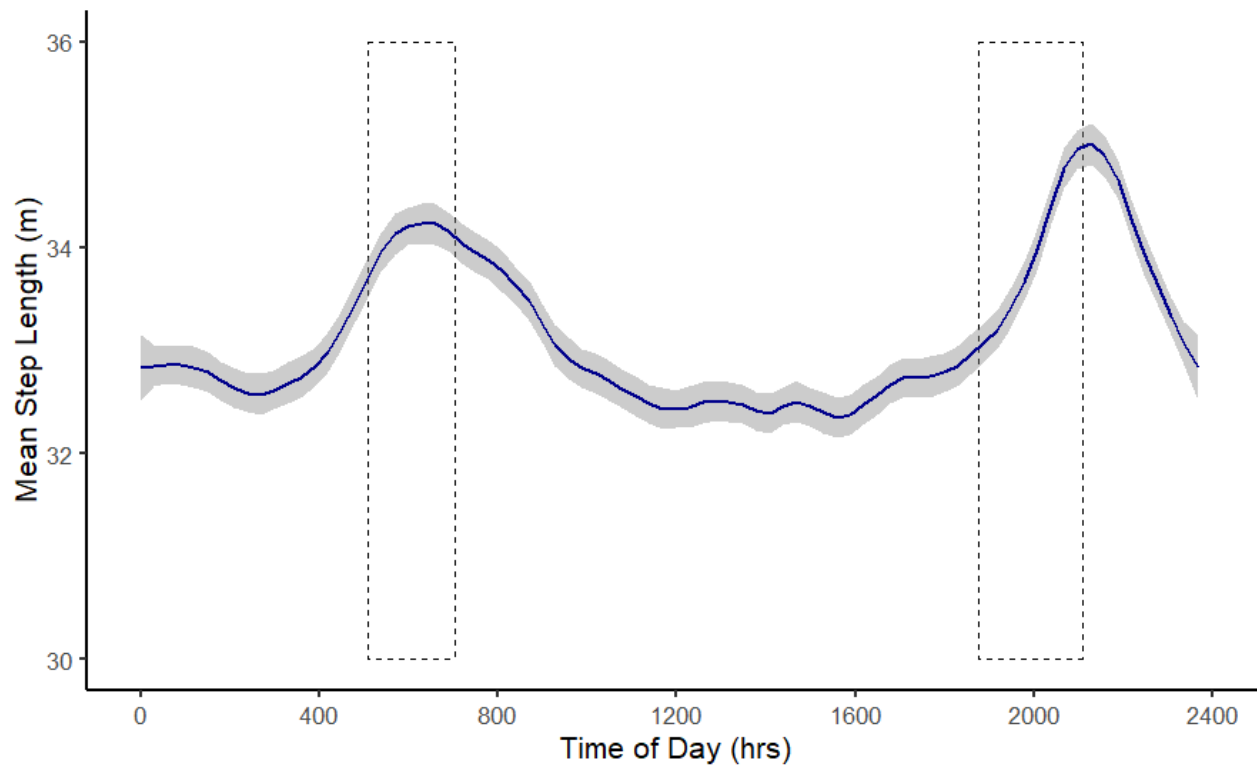

Fig A2. Interaction plots showing relationships for significant interactions between temperature and relative selection strengths (RSS) of variables of interest (A: Step length and temperature, B: Shade and temperature, C: Distance to bog and temperature, D: Distance to mixed forest and temperature) at progressively longer intervals between GPS locations (1: 20-minute, 2: 1-hour, 3: 2-hour, and 4: 4-hour). Patterns in the selection strength of interactions progressively weaken as the interval between GPS locations increases, in part explaining why other studies have not found consistent effects of temperature on moose movement.

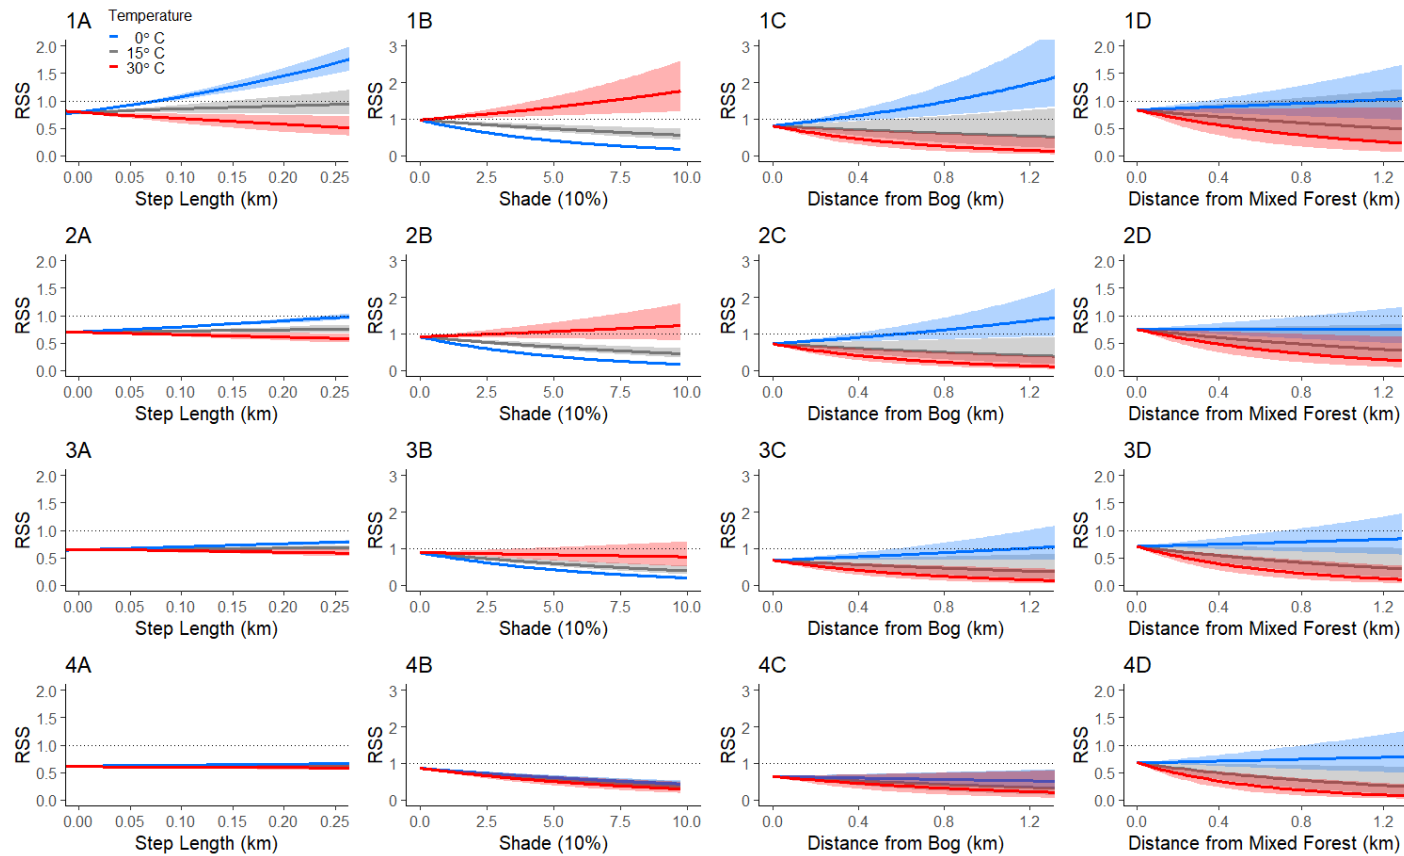

Source: https://www.biorxiv.org/content/10.1101/790048v1.full.pdf
